# Supplementary material for: Multiple cobalt active sites evenly embedded in mesoporous carbon nanospheres derived from a polymer-metal-organic framework: efficient removal and photodegradation of malachite green
Source: Royal Society of Chemistry journal article supplement (doi:10.1039/d2ra04906f), 2022-01-01
Supplement: d2ra04906f1.pdf [file d2ra04906f1.pdf]

1  
2  
3  
4  
5  
6  
7  
8  
9  
10  
11  
12  
13  
14  
15  
16

*Supplementary Material for*

**Multiple cobalt active sites evenly embedded within mesoporous  
carbon nanospheres derived from polymer-metal-organic  
framework: Efficient removal and photodegradation of  
malachite green**

Shuai Zhang, Hao Dang, Feilong Rong, Shunjiang Huang, Minghua Wang, Lijun Hu,

Zhihong Zhang\*

College of Material and Chemical Engineering, Zhengzhou University of Light  
Industry, Zhengzhou 450001, China

\* Corresponding authors. E-mail addresses: 2006025@zzuli.edu.cn (Z. Zhang).

|    |                                                                                               |
|----|-----------------------------------------------------------------------------------------------|
| 17 | <b>Content</b>                                                                                |
| 18 | <b>S1. Experimental section</b>                                                               |
| 19 | <b>S1.1 Materials and reagents</b>                                                            |
| 20 | <b>S1.2 Preparation of poly-terephthalic acid (pbdc-8)</b>                                    |
| 21 | <b>S1.3 Basic characterizations</b>                                                           |
| 22 | <b>S1.4 Test for radical trapping</b>                                                         |
| 23 | <b>S1.5 Electrochemical tests</b>                                                             |
| 24 | <b>S2. Basic characterizations of polyMOF(Co)</b>                                             |
| 25 | <b>S3. Basic characterizations of the series of Co/Co<sub>x</sub>O<sub>y</sub>@mC hybrids</b> |
| 26 | <b>S4 Photocatalytic degradation of malachite green</b>                                       |
| 27 |                                                                                               |

## 28 **S1. Experimental section**

### 29 **S1.1 Materials and reagents**

30 2,5-dihydroxyterephthalic acid, 1,8-dibromooctane, cobaltous nitrate hexahydrate,  
31 *N,N*-dimethylformamide (DMF), tetrahydrofuran and all other chemicals were  
32 purchased from Aladdin Reagent Co. Ltd. All reagents were analytical grade reagents  
33 and used without further purification. The deionized water used throughout all  
34 experiments.

### 35 **S1.2 Preparation of poly-terephthalic acid (pbdc)**

36 The ligand of pbdc was synthesized according to our previous work <sup>1</sup>.

### 37 **S1.3 Basic characterizations**

38 The crystal structure of the precursor and final product were both analyzed by  
39 TongdaTD-3500X-ray powder diffractometer with Cu-K $\alpha$  radiation. Raman spectra  
40 were gained from a Renishaw inVia Raman spectrometer with a solid-state laser  
41 (excitation at 532 nm) at room temperature in the range of 100-3000 cm<sup>-1</sup>. The chemical  
42 structure was probed through by the Fourier transform infrared spectroscopy (FT-IR)  
43 (Bruker TENSOR27, Germany). Surface electronic structure was analyzed by X-ray  
44 photoelectron spectroscopy (XPS) by using a VG ESCALAB HP photoelectron  
45 spectrometer equipped with an analyzer and preparation chambers. Inductively coupled  
46 plasma mass spectrometry (ICP-MS, PerkinElmer, Elan9000) was used to determine  
47 the Co content of Co/Co<sub>x</sub>O<sub>y</sub>@mC hybrids. The surface morphology of the synthesized  
48 catalysts was investigated through scanning electron microscope (SEM, JSM-6490LV,  
49 Japan) and transmission electron microscopy (TEM, Hitachi H-800, Tokyo, Japan).

50 Also, the specific surface areas of all samples were calculated by the Brunauer-Emmett-  
51 Teller (BET) method.

#### 52 **S1.4 Test for radical trapping**

53 The experiments for radical trapping were performed using the same process as  
54 the measurements of photocatalytic activity except for addition of different scavengers,  
55 including KI (2 mM), benzoquinone (BQ) (2 mM), AgNO<sub>3</sub> (2 mM), and isopropyl  
56 alcohol (IPA) (2 mM), which were employed as scavengers to trap the catalytic active  
57 sites hole ( $h^+$ ), superoxide radicals ( $\bullet\text{O}_2^-$ ), electron ( $e^-$ ), and hydroxyl radicals ( $\bullet\text{OH}$ ),  
58 respectively. Moreover, electron spin resonance (ESR) spectrometry was applied to  
59 determine the types of radical species on a JES-FA spectrometer under visible light  
60 irradiation by using 5,5-dimethyl-1-pyrroline N-oxide (DMPO) as spin trapping agents.

#### 61 **S1.5 Electrochemical analysis**

62 The photocurrent, Mott-Schottky plots, and electrochemical impedance  
63 spectroscopy (EIS) were measured on CHI660D electrochemical analyzer in the three-  
64 electrode system with a 300 W Xe arc lamp as light source. The three-electrode system  
65 takes a platinum wire as counter electrode, FTO (1.5 × 3.0 cm) coated with  
66 photocatalyst as working electrode and an Ag/AgCl (saturated KCl) as reference  
67 electrode. Typically, the as-prepared photocatalyst (8.0 mg) was dispersed in absolute  
68 ethanol (1.0 mL) with an ultrasonic bath for 30 min. After that, the photocatalyst (50  
69  $\mu\text{L}$ ) was coated onto the FTO and dried naturally. The photocurrent and Mott-Schottky  
70 plots were recorded in 0.5 M Na<sub>2</sub>SO<sub>4</sub> solution. Meanwhile, the EIS was performed in a  
71 0.1 M KCl solution containing 5 mM [Fe(CN)<sub>6</sub>]<sup>3-/4-</sup>.

## 72 S2. Basic characterizations of polyMOF(Co)

73 **Figs. S1a** indicates that polyMOF(Co) exhibits sphere-like shape, which  
74 comprising large amounts of micro- and nano-spheres with the different diameters (0.5-  
75 2 $\mu$ m) and smooth surface. Occasionally, two or several spheres are grown together and  
76 formed irregular shape (**Fig. S1b**), further confirming by the TEM image (**Fig. S1c**).  
77 The TEM image of polyMOF(Co) also displays the smooth surface, while the high-  
78 resolution TEM image (**Fig. S1e**) does show the blurry lattice fringe spacing of 0.204  
79 nm that is ascribed to Co (111)<sup>2</sup>. In addition, the elemental mapping indicates that Co,  
80 C, O are distributed evenly. The EDX spectrum (**Fig. S2a**) shows that the atomic  
81 percentages of Co, O and C content are 15.25%, 39.48% and 46.27%, respectively. **Fig.**  
82 **S2b** indicates that the peaks are located at 7.62°, 9.72°, 13.44°, 19.40°, and 26.24° in the  
83 XRD pattern of polyMOF(Co), which is similar with Co-BDC MOF<sup>3</sup>, indicating the  
84 successful preparation of polyMOF(Co). Additionally, it can be observed amorphous  
85 carbon peak located at 20.44°, which can be explained by the utilization of polymer  
86 ligand for the preparation of polyMOF. **Fig. S2c** indicates the FT-IR spectrum of  
87 polyMOF(Co), in which the absorption peaks at 2854 cm<sup>-1</sup> and 2940 cm<sup>-1</sup> due to -CH<sub>2</sub>-  
88 and -CH<sub>3</sub> are obtained for polyMOF(Co). These groups are apparently originated from  
89 polymer ligand.

90 **Fig. S2d** depicts the N<sub>2</sub> adsorption-desorption isotherm of polyMOF(Co) displays  
91 a H<sub>3</sub> hysteresis loop. As the result a specific surface area of 85.7 m<sup>2</sup>g<sup>-1</sup> and the pore  
92 diameters of 7.55 nm are observed (**Fig. S2d, inset**). As compared, the specific surface  
93 area of polyMOF(Co) is substantially smaller than those of common MOFs<sup>4</sup>. It is

94 mainly due to the usage of polymer ligand, and the pore was filled by the methylene  
95 spacers<sup>5</sup>. Meanwhile, the Raman spectrum (**Fig. S2e**) indicates that the peak located at  
96 1613 cm<sup>-1</sup> is ascribed to phenyl ring of the polymer ligand. All results indicate  
97 polyMOF(Co) was synthesized successfully.

98

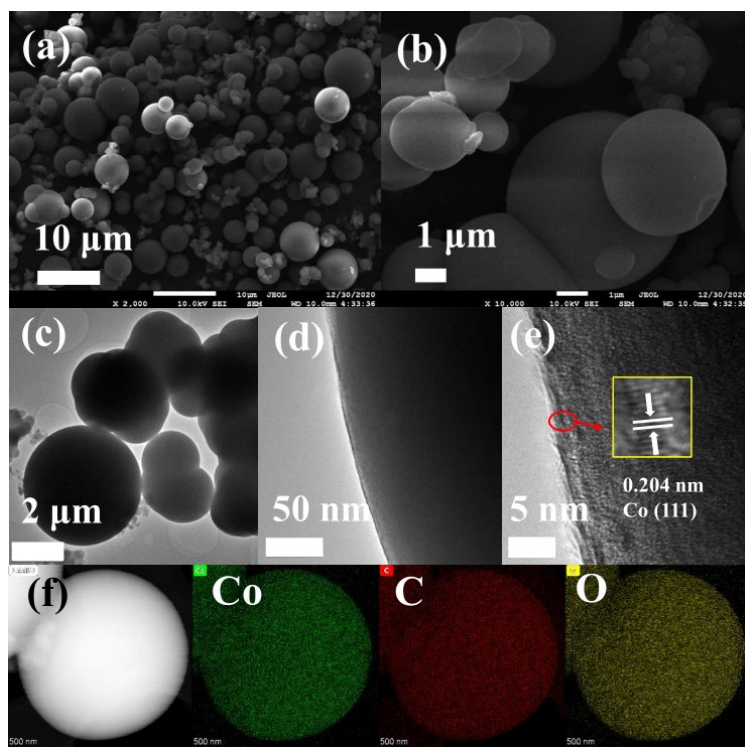

99

100 **Fig. S1** (a, b) Low- and high-magnification SEM images, (c, d, e) low-, high-  
101 magnification, and high-resolution TEM images, and (f) EDX mapping images of  
102 polyMOF(Co).

103

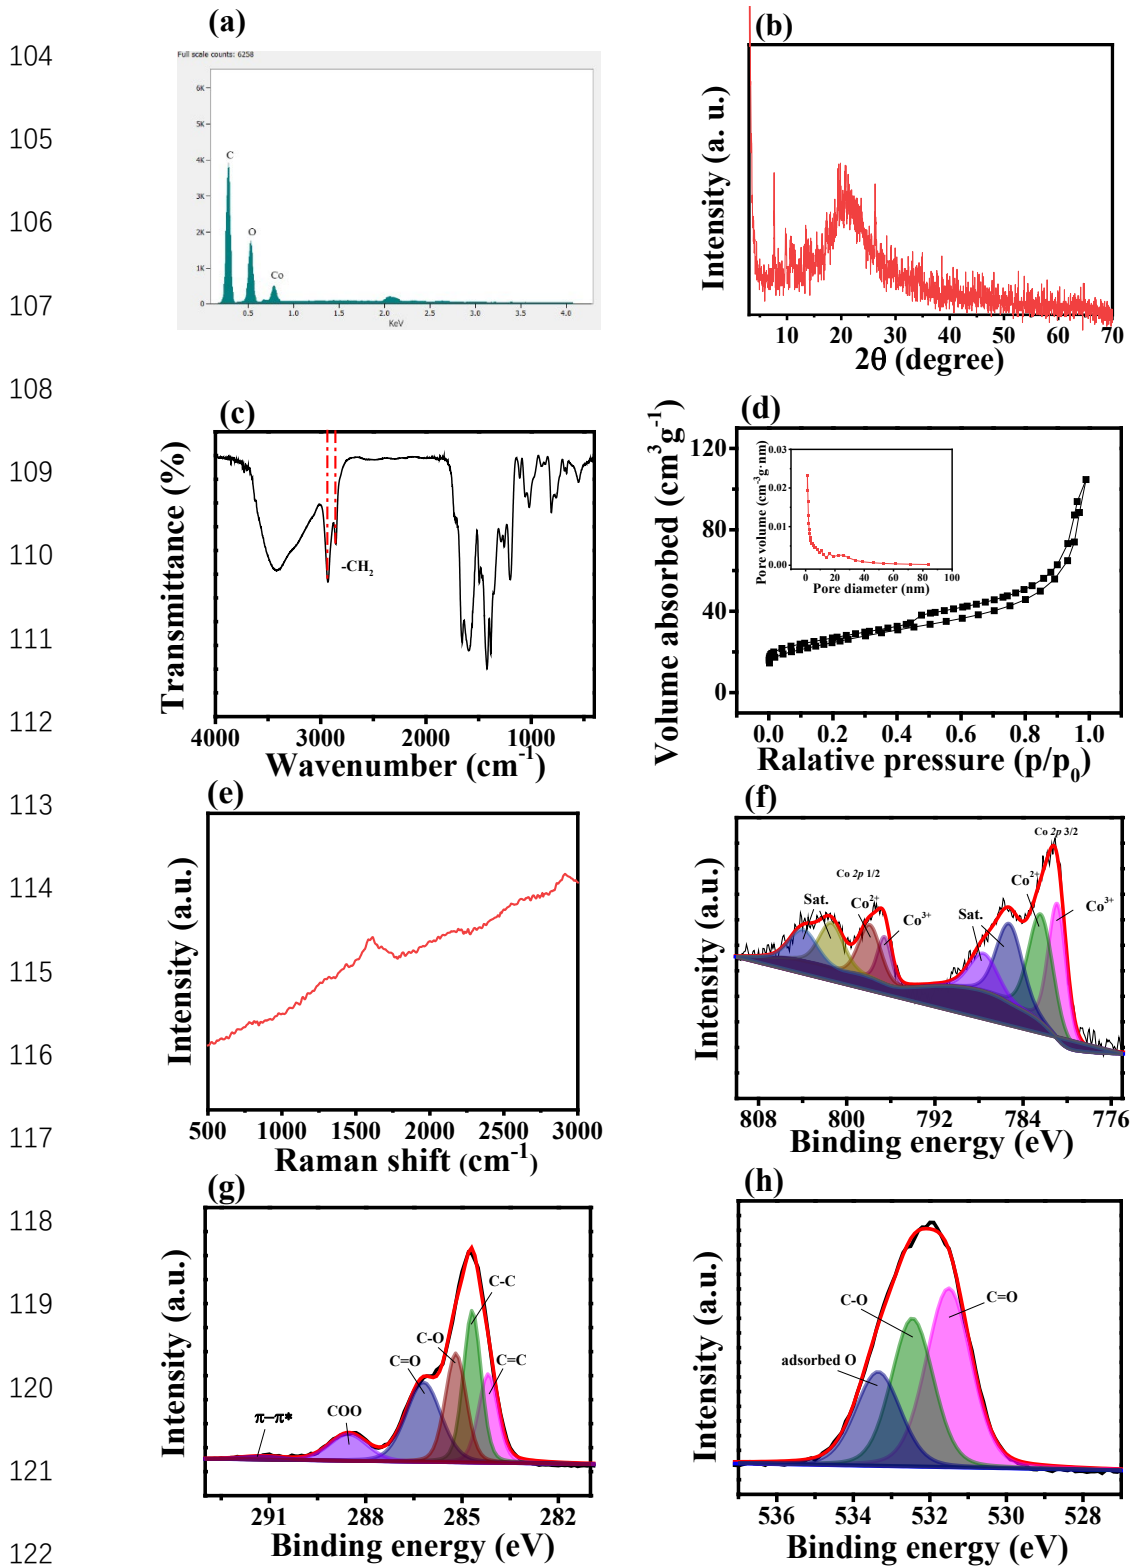

123 **Fig. S2** (a) EDX spectrum, (b) XRD pattern, (c) FT-IR spectrum, (d) N<sub>2</sub> adsorption–  
 124 desorption isotherm, inset image: corresponding pore size distribution curve and high-  
 125 resolution, (e) Raman spectra, (f) Co 2p, (g) C 1s, and (h) O 1s XPS spectra of

126 polyMOF(Co).

127 **S3. Basic characterizations of the series of Co/Co<sub>x</sub>O<sub>y</sub>@mC hybrids**

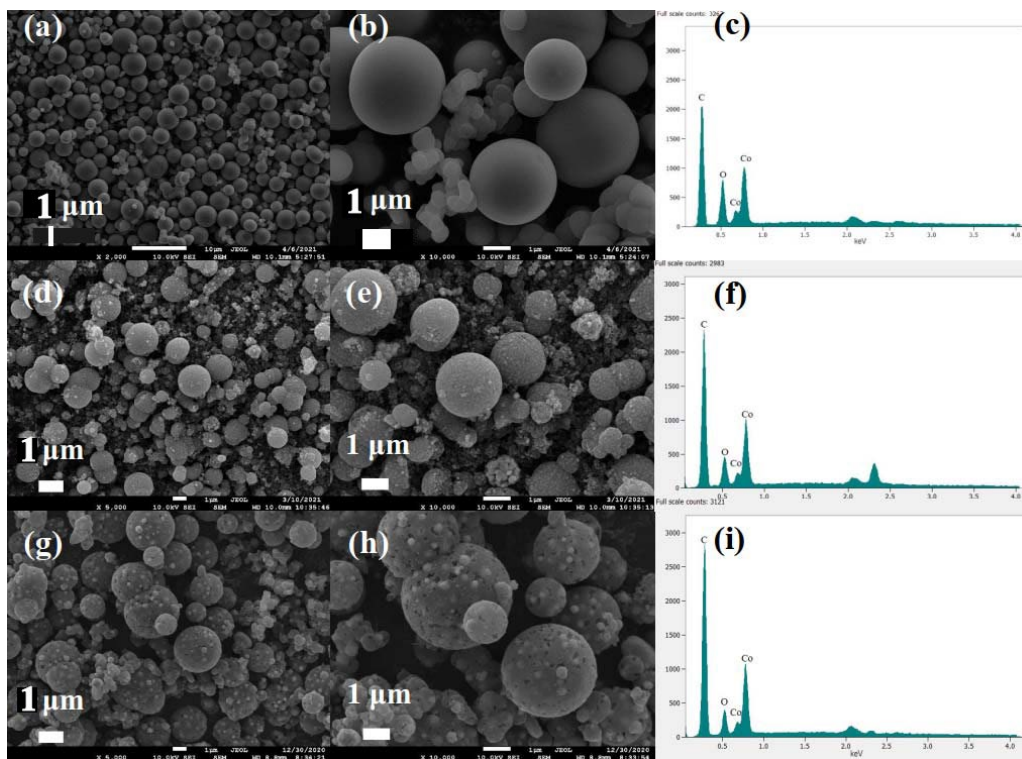

128

129 **Fig. S3** Low- and high-magnification SEM images and EDX spectra of (a, b, c)

130 Co/Co<sub>x</sub>O<sub>y</sub>@mC<sub>400</sub>, (d, e, f) Co/Co<sub>x</sub>O<sub>y</sub>@mC<sub>600</sub>, and (g, h, i) Co/Co<sub>x</sub>O<sub>y</sub>@mC<sub>800</sub> hybrids.

131



132

133

**Table S1** The content of each component containing in all samples

| Sample                                               | Atomic%    |            | ICP-MS    |
|------------------------------------------------------|------------|------------|-----------|
|                                                      | C 1s       | O 1s       | Co (%)    |
| polyMOF(Co)                                          | 46.27±0.03 | 39.48±0.08 | 12.1±0.1  |
| Co/Co <sub>x</sub> O <sub>y</sub> @mC <sub>400</sub> | 57.24±0.05 | 21.81±0.12 | 15.5±0.6  |
| Co/Co <sub>x</sub> O <sub>y</sub> @mC <sub>600</sub> | 65.37±0.1  | 19.25±0.14 | 18.11±3.6 |
| Co/Co <sub>x</sub> O <sub>y</sub> @mC <sub>800</sub> | 69.99±0.05 | 16.48±0.4  | 18.43±5.4 |

134

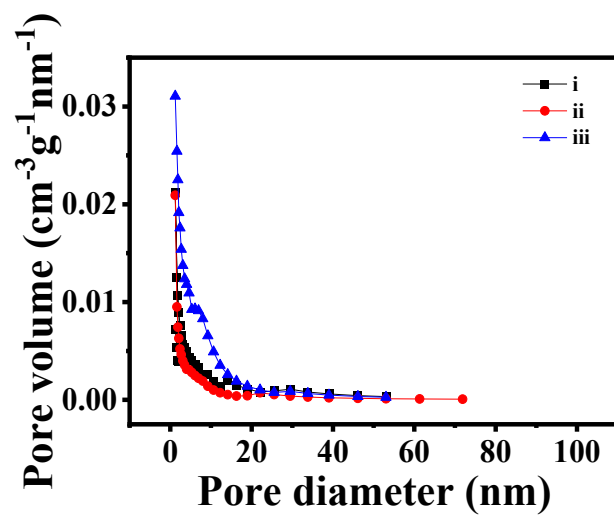

135

136 **Fig. S4** The corresponding pore size distribution curves of (i) Co/Co<sub>x</sub>O<sub>y</sub>@mC<sub>400</sub>, (ii)

137 Co/Co<sub>x</sub>O<sub>y</sub>@mC<sub>600</sub>, and (iii) Co/Co<sub>x</sub>O<sub>y</sub>@mC<sub>800</sub>.

138

139 **Table S2** BET surface areas, pore diameters, and pore volumes of the series of  
140 Co/Co<sub>x</sub>O<sub>y</sub>@mC hybrids.

| <b>Sample</b>                                        | <b>BET surface area<br/>(m<sup>2</sup> g<sup>-1</sup>)</b> | <b>Pore diameter<br/>(nm)</b> | <b>Pore volume<br/>(cm<sup>3</sup> g<sup>-1</sup>)</b> |
|------------------------------------------------------|------------------------------------------------------------|-------------------------------|--------------------------------------------------------|
| polyMOF(Co)                                          | 85.7                                                       | 7.55                          | 0.1619                                                 |
| Co/Co <sub>x</sub> O <sub>y</sub> @mC <sub>400</sub> | 161                                                        | 3.50                          | 0.1415                                                 |
| Co/Co <sub>x</sub> O <sub>y</sub> @mC <sub>600</sub> | 236                                                        | 2.37                          | 0.1400                                                 |
| Co/Co <sub>x</sub> O <sub>y</sub> @mC <sub>800</sub> | 264                                                        | 3.61                          | 0.2382                                                 |

141

142

143

144

145

146

147

148

149

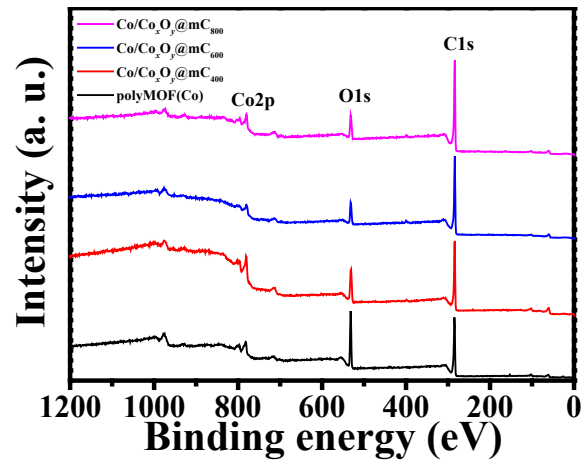

150 **Fig. S5** XPS survey scan spectra of polyMOF(Co), Co/Co<sub>x</sub>O<sub>y</sub>@mC<sub>400</sub>,

151 Co/Co<sub>x</sub>O<sub>y</sub>@mC<sub>600</sub>, and Co/Co<sub>x</sub>O<sub>y</sub>@mC<sub>800</sub>.

152

153 **S4 Photocatalytic degradation of malachite green**

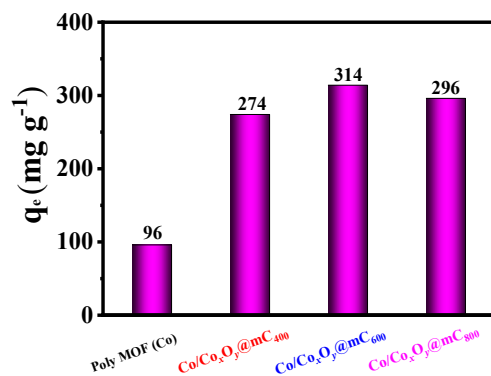

154

155 **Fig. S6** Comparison of maximum adsorption capacity of malachite green on different

156

adsorbents

157

158 **Table S3** Kinetic parameters of kinetic fitting for the removal of MG using diverse  
 159 catalysts of polyMOF(Co) and the series of Co/Co<sub>x</sub>O<sub>y</sub>@mC hybrids.

|                                                      | Fitting parameters of quasi<br>first order dynamics |                                      |                | Fitting parameters of quasi<br>second order dynamics |                                   |                |
|------------------------------------------------------|-----------------------------------------------------|--------------------------------------|----------------|------------------------------------------------------|-----------------------------------|----------------|
|                                                      | K <sub>1</sub><br>min <sup>-1</sup>                 | q <sub>e</sub><br>mg·g <sup>-1</sup> | R <sup>2</sup> | K <sub>2</sub><br>g (min·mg) <sup>-1</sup>           | q <sub>e</sub> mg·g <sup>-1</sup> | R <sup>2</sup> |
| polyMOF(Co)                                          | 0.0301                                              | 88                                   | 0.980          | 0.0003540                                            | 116                               | 0.9973         |
|                                                      |                                                     |                                      | 3              |                                                      |                                   |                |
| Co/Co <sub>x</sub> O <sub>y</sub> @mC <sub>400</sub> | 0.0247                                              | 302                                  | 0.980          | 0.0000278                                            | 455                               | 0.9797         |
|                                                      |                                                     |                                      | 5              |                                                      |                                   |                |
| Co/Co <sub>x</sub> O <sub>y</sub> @mC <sub>600</sub> | 0.0257                                              | 328                                  | 0.964          | 0.0000473                                            | 435                               | 0.9893         |
|                                                      |                                                     |                                      | 1              |                                                      |                                   |                |
| Co/Co <sub>x</sub> O <sub>y</sub> @mC <sub>800</sub> | 0.0268                                              | 346                                  | 0.963          | 0.0000246                                            | 500                               | 0.9533         |
|                                                      |                                                     |                                      | 1              |                                                      |                                   |                |

160

161

162

163 **Table S4** Langmuir and Freundlich adsorption isotherm model parameters

| Langmuir fitting parameters |                             |        | Freundlich fitting parameters |        |        |
|-----------------------------|-----------------------------|--------|-------------------------------|--------|--------|
| $k_3$                       | $q_m$ (mg g <sup>-1</sup> ) | $R^2$  | $k_4$ (L mg <sup>-1</sup> )   | $1/n$  | $R^2$  |
| 0.4283                      | 308                         | 0.9875 | 128.58                        | 0.2237 | 0.8970 |

164

165

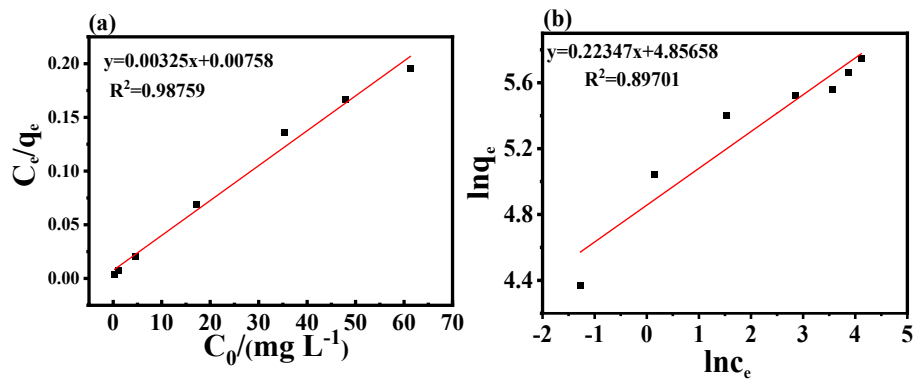

166

167

**Fig. S7** (a) Adsorption equation fitting curve of Langmuir isotherms, and (b)

168

adsorption equation fitting curve of Freundlich isotherms

169



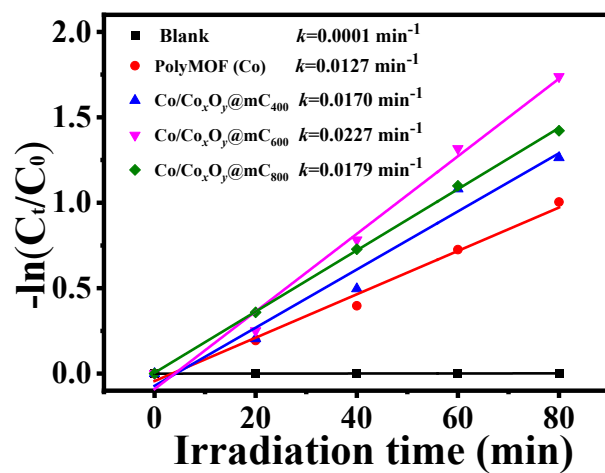

171

172 **Fig. S8** The pseudo-first-order kinetic fitting curves of polyMOF(Co),173 Co/Co<sub>x</sub>O<sub>y</sub>@mC<sub>400</sub>, Co/Co<sub>x</sub>O<sub>y</sub>@mC<sub>600</sub>, and Co/Co<sub>x</sub>O<sub>y</sub>@mC<sub>800</sub> for photocatalytic

174

degradation of MG

175

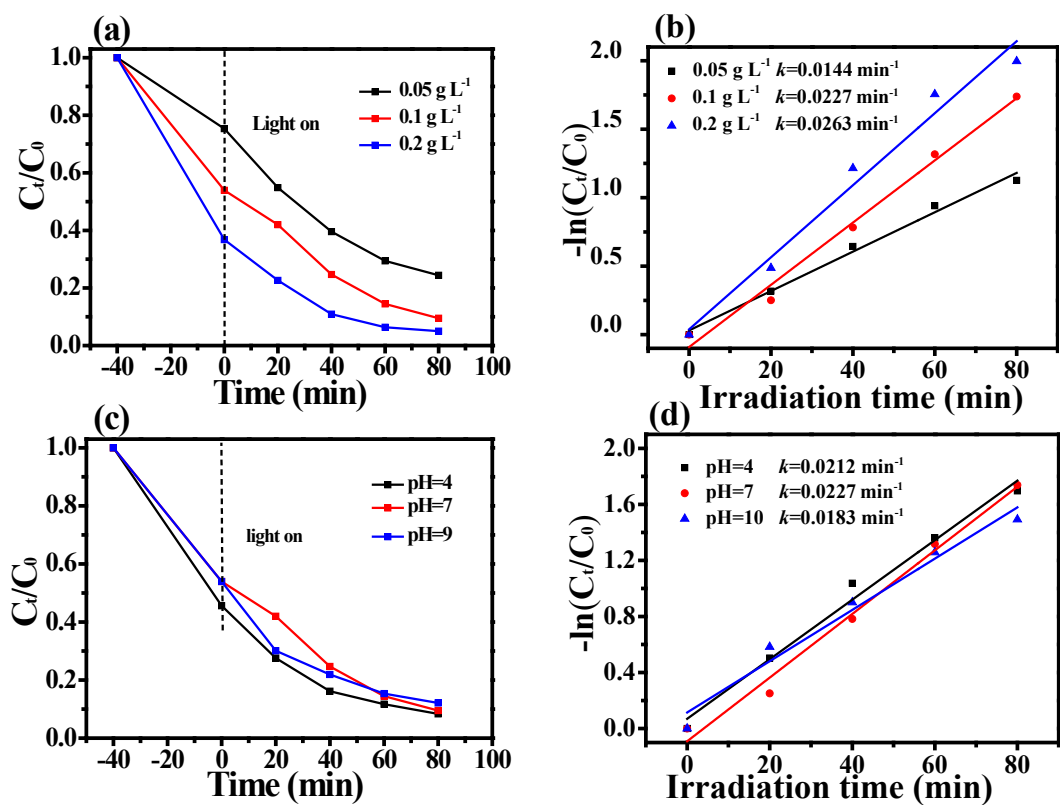

176

177

178 **Fig. S9** The effects of (a) the amount of catalyst, (c) pH values, on the MG

179 degradation and (b, d) their corresponding reaction rate constants. Reaction

180 parameters: (a) [MG] = 80 mg L<sup>-1</sup>, [pH] = 7.0, and [T] = 25 °C; (c) [MG] = 80 mg L<sup>-1</sup>

181 and [Co/Co<sub>x</sub>O<sub>y</sub>@mC<sub>600</sub>] = 0.1 g L<sup>-1</sup>; [T] = 25 °C.

182

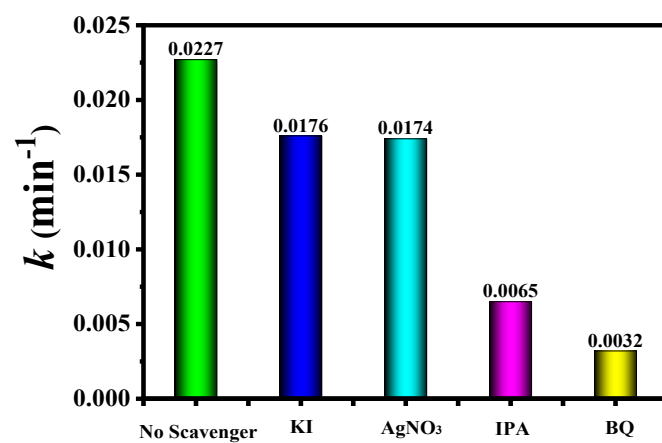

183

184 **Fig. S10** The reaction rate constants  $k$  based on the different scavengers for MG

185

photodegradation

186

187

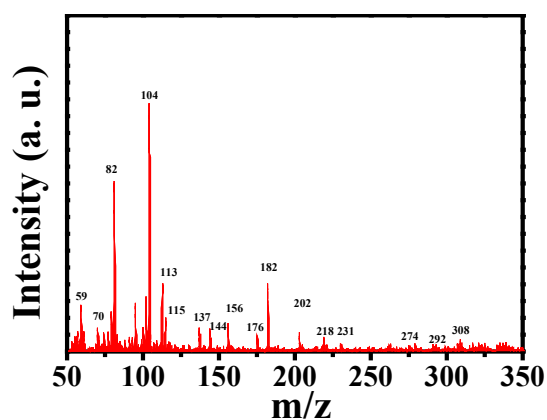

188

189 **Fig. S11** MS spectra of the MG solution eluted after reaction time of 80 min over

190  $\text{Co}/\text{Co}_x\text{O}_y@\text{mC}_{600}$ .

191

192

193

194

195

196

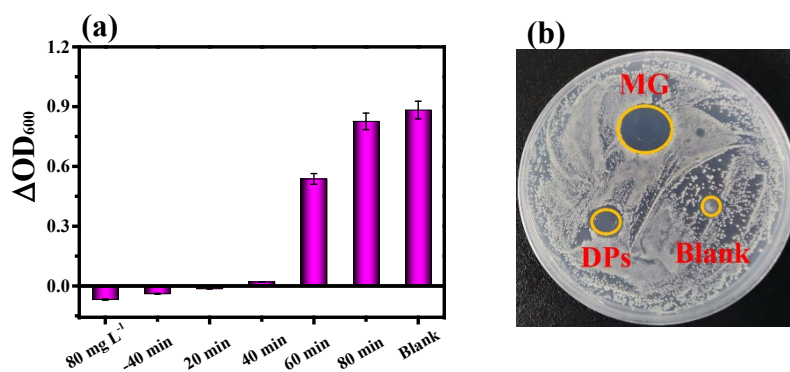

197 **Fig. S12** (a) The  $\text{OD}_{600}$  values of *E. coli* in blank control and degraded solution groups

198 using  $\text{Co}/\text{Co}_x\text{O}_y@\text{mC}_{600}$  and (b) the inhibition zone of blank, pure MG solution, and

199 solution containing DPs toward the *E. coli* growth.

200

201

202

203

204 **Table S5** Intermediate products of MG during the treatment process detected by LC-  
 205 MS/MS.

| Compounds | m/z | Molecular formula                                | Possible molecular structure |
|-----------|-----|--------------------------------------------------|------------------------------|
| MG        | 329 | C <sub>23</sub> H <sub>25</sub> N <sub>2</sub>   |                              |
| MG 1      | 307 | C <sub>19</sub> H <sub>17</sub> NO <sub>3</sub>  |                              |
| MG 2      | 292 | C <sub>19</sub> H <sub>20</sub> N <sub>2</sub> O |                              |
| MG 3      | 274 | C <sub>19</sub> H <sub>18</sub> N <sub>2</sub>   |                              |
| MG 4      | 231 | C <sub>13</sub> H <sub>13</sub> NO <sub>3</sub>  |                              |
| MG 5      | 218 | C <sub>13</sub> H <sub>14</sub> O <sub>3</sub>   |                              |
| MG 6      | 202 | C <sub>13</sub> H <sub>14</sub> O <sub>2</sub>   |                              |

---

MG 7

183

$C_{13}H_{13}N$

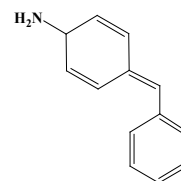

MG 8

176

$C_{13}H_{20}$

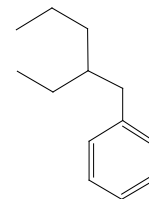

MG 9

156

$C_{10}H_{20}O$

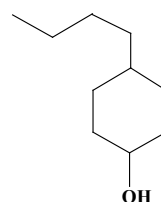

MG 10

144

$C_7H_{12}O_2$

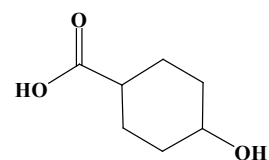

MG 11

137

$C_8H_{11}NO$

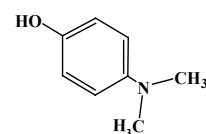

MG 12

115

$C_6H_{11}NO$

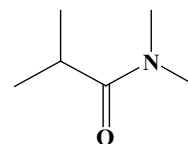

MG 13

113

$C_6H_{13}NO$

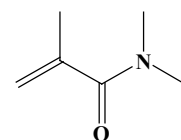

MG 14

104

$C_5H_{12}O_2$

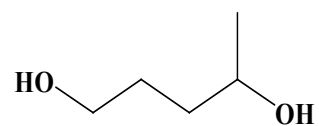

MG 15

82

$C_6H_{10}$

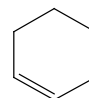

MG 16

70

$C_5H_{10}$

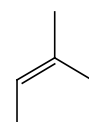

---

206

207

208

209 **References:**

- 210 1. Q. Jia, Y. Lou, F. Rong, S. Zhang, M. Wang, L. He, Z. Zhang and M. Du, *J.*  
211 *Mater. Chem. C*, 2021, **9**, 14190-14200.
- 212 2. H. Lv, X. Liang, G. Ji, H. Zhang and Y. Du, *ACS Appl. Mater. Interfaces*, 2015,  
213 **7**, 9776-9783.
- 214 3. Q. Zha, F. Yuan, G. Qin and Y. Ni, *Inorg. Chem.*, 2020, **59**, 1295-1305.
- 215 4. S. Ayala, Z. Zhang and S. M. Cohen, *Chem. Commun.*, 2017, **53**, 3058-3061.
- 216 5. H. Wu, Y. S. Chua, V. Krungleviciute, M. Tyagi, P. Chen, T. Yildirim and W.  
217 Zhou, *J. Am. Chem. Soc.*, 2013, **135**, 10525-10532.

218
